# Supplementary material for: Climatic Factors Determine the Distribution Patterns of Leaf Nutrient Traits at Large Scales
Source: MDPI journal article supplement (doi:10.3390/plants11162171), 2022-08-21
Supplement: s1 [file s1]

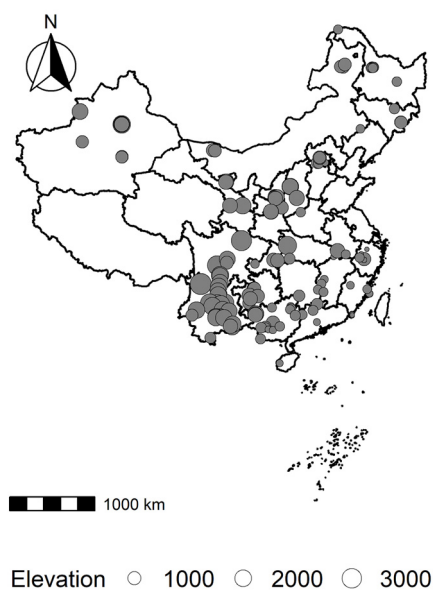

**Figure S1.** Sample site map of the distribution of the sample sites used for this experimental study in China. The sample sites range from 19.1°N to 53.5°N and 79.7°E to 129.3°E.

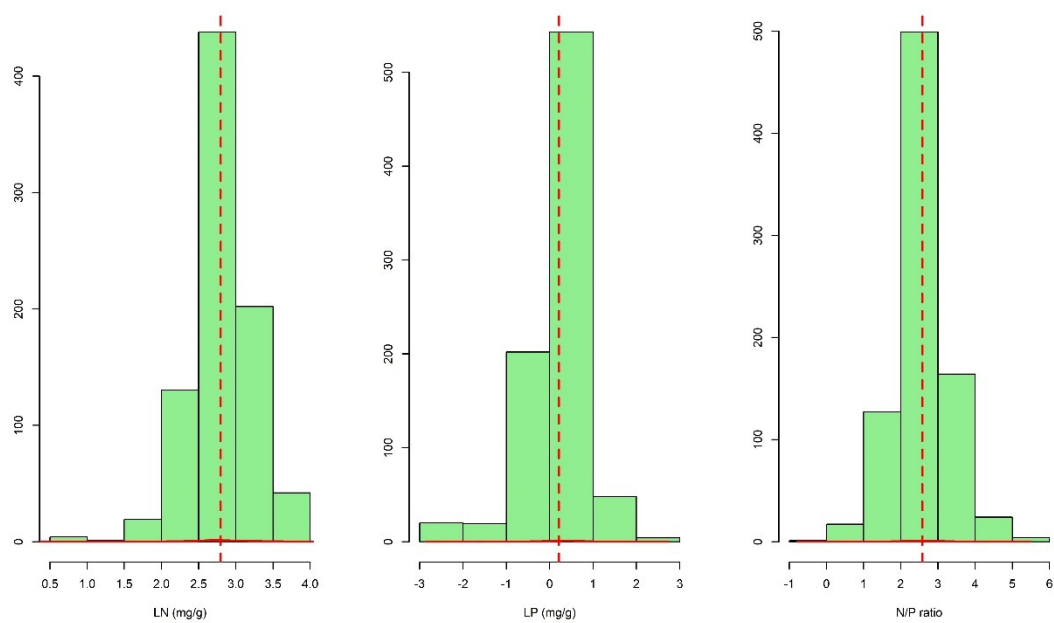

**Figure S2.** Normal distribution charts for LN, LP, and N/P data.
